# Supplementary material for: Determination of short-chain fatty acids in feces by capillary electrophoresis with indirect UV-VIS detection
Source: Royal Society of Chemistry journal article supplement (doi:10.1039/c9ay01202h), 2019-01-01
Supplement: c9ay01202h1.pdf [file c9ay01202h1.pdf]

## Supporting information

### Determination of short-chain fatty acids in feces by capillary electrophoresis with indirect UV-VIS detection

Ondřej Hodek, Tomáš Křížek

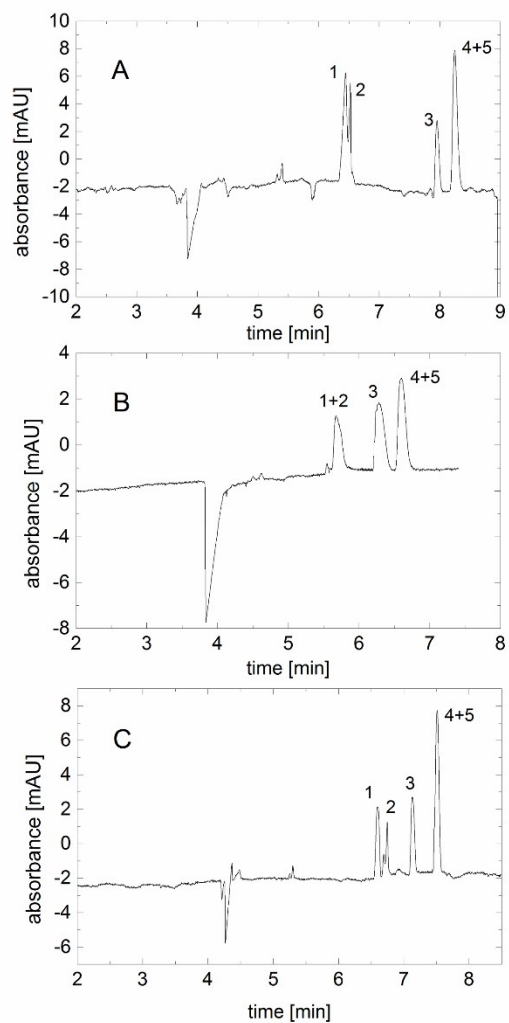

**Fig. 1S** Electropherograms of the 0.1 mM SCFA standard mixture measured at (A) pH 4.0, (B) pH 8.2 (C) pH 5.7. BGE: 10 mM  $\beta$ -Ala + 10 mM benzoic acid with 0.5 mM CTAB. U = -20 kV. Peak assignment: 1 – acetic acid, 2 – system peak, 3 – propionic acid, 4 – isobutyric acid, 5- butyric acid.
